# Supplementary material for: Runting and Stunting Syndrome Is Associated With Mitochondrial Dysfunction in Sex-Linked Dwarf Chicken
Source: PubMed Central journal article supplement (PMC6978286; doi:10.3389/fgene.2019.01337), 2020-01-17
Supplement: Image_1.pdf [file Image_1.pdf]

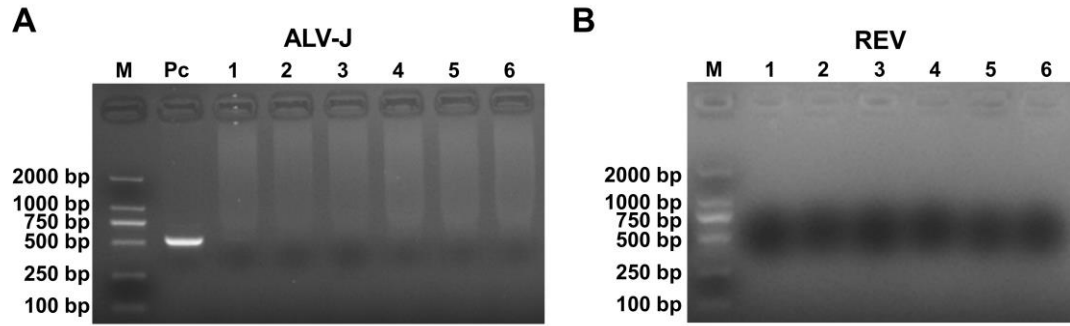

**Figure S1. The ALV-J and REV viruses detection of RSS chickens. (A, B) All RSS chickens (1-6) were ALV-J and REV virus negative. M, DL 2000 marker. Pc, positive control.**
